# Supplementary material for: Bayesian meta-analysis models for microarray data: a comparative study
Source: Springer Nature journal article supplement (doi:10.1186/1471-2105-8-80), 2007-03-07

## Supplemental Figures

### **Bayesian meta-analysis models for microarray data: a comparative study**

Erin M Conlon<sup>§</sup>, Joon J Song, Anna Liu

<sup>§</sup>Corresponding author: [econlon@mathstat.umass.edu](mailto:econlon@mathstat.umass.edu)

**Figure S1 - Sensitivity analysis results for the two-study simulation data**

Sensitivity analysis results for 3 and 40 degrees of freedom for the prior distributions of the slide and experiment variation parameters,  $\phi_{jg}^2$  and  $\sigma_{jg}^2$ , respectively, for the two-study simulation data set with medium mean  $\tau_g^2 = 0.3$  (differentially expressed); 0.03 (non-differentially expressed) and simulated percent differentially expressed genes  $p_s = 10\%$ . a) True integration-driven discovery rate ( $tIDR$ ) versus threshold values of posterior probability of differential expression  $\gamma \geq 0.50$ , for the standardized expression integration model (blue circles) and probability integration model (black diamonds); b) True integration-driven revision rate ( $tIRR$ ) versus threshold values of posterior probability of differential expression  $\gamma \geq 0.50$ , for the standardized expression integration model (blue circles) and probability integration model (black diamonds); c) The maximum number of true discovered genes versus posterior expected false discovery rate ( $peFDR$ ) for the standardized expression integration model (blue circles), probability integration model (black diamonds), individual analyses of Study 1 (red checks) and Study 2 (green triangles).

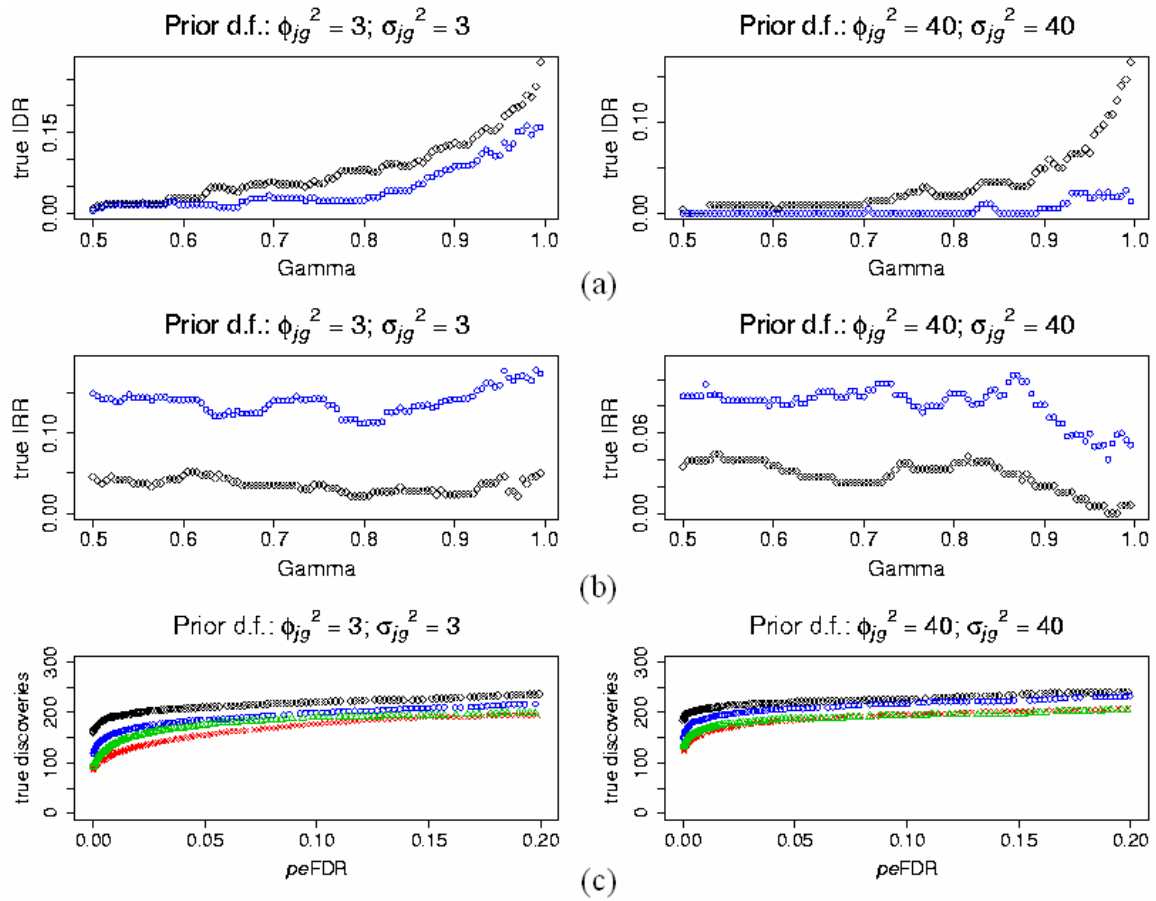

**Figure S2 - Sensitivity analysis results for the five-study simulation data**

Sensitivity analysis results for 3 and 40 degrees of freedom for the prior distributions of the slide and experiment variation parameters,  $\phi_{jg}^2$  and  $\sigma_{jg}^2$ , respectively, for the five-study simulation data set with medium mean  $\tau_g^2 = 0.3$  (differentially expressed); 0.03 (non-differentially expressed) and simulated percent differentially expressed genes  $p_s = 10\%$ . a) True integration-driven discovery rate ( $tIDR$ ) versus threshold values of posterior probability of differential expression  $\gamma \geq 0.50$ , for the standardized expression integration model (blue circles) and probability integration model (black diamonds); b) True integration-driven revision rate ( $tIRR$ ) versus threshold values of posterior probability of differential expression  $\gamma \geq 0.50$ , for the standardized expression integration model (blue circles) and probability integration model (black diamonds); c) The maximum number of true discovered genes versus posterior expected false discovery rate ( $peFDR$ ) for the standardized expression integration model (blue circles), probability integration model (black diamonds), individual analyses of Study 1 (red checks), Study 2 (green triangles), Study 3 (turquoise pluses), Study 4 (pink inverted triangles) and Study 5 (gold stars).

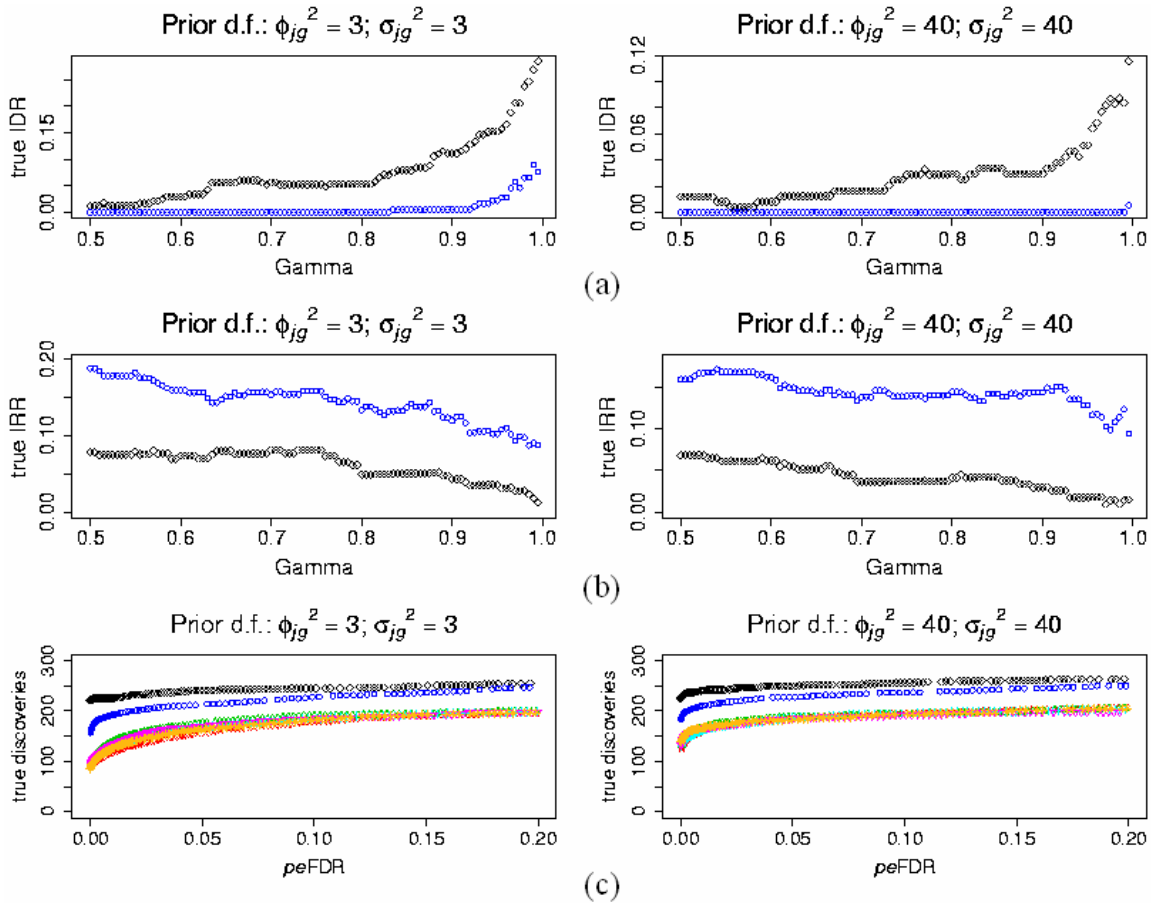

### Figure S3 - Sensitivity analysis results for the biological data

Sensitivity analysis results for 3 and 40 degrees of freedom for the prior distributions of the slide and experiment variation parameters,  $\phi_{jg}^2$  and  $\sigma_{jg}^2$ , respectively, for the *B. subtilis* mutant and induction biological study data. a) Integration-driven discovery rate (IDR) versus threshold values of posterior probability of differential expression  $\gamma \geq 0.50$ , for the standardized expression integration model (blue circles) and probability integration model (black diamonds); b) Integration-driven revision rate (IRR) versus threshold values of posterior probability of differential expression  $\gamma \geq 0.50$ , for the standardized expression integration model (blue circles) and probability integration model (black diamonds); c) The maximum number of differentially expressed genes versus posterior expected false discovery rate (*peFDR*) for the standardized expression integration model (blue circles), probability integration model (black diamonds), individual analyses of *B. subtilis* mutant study (red checks) and induction study (green triangles).

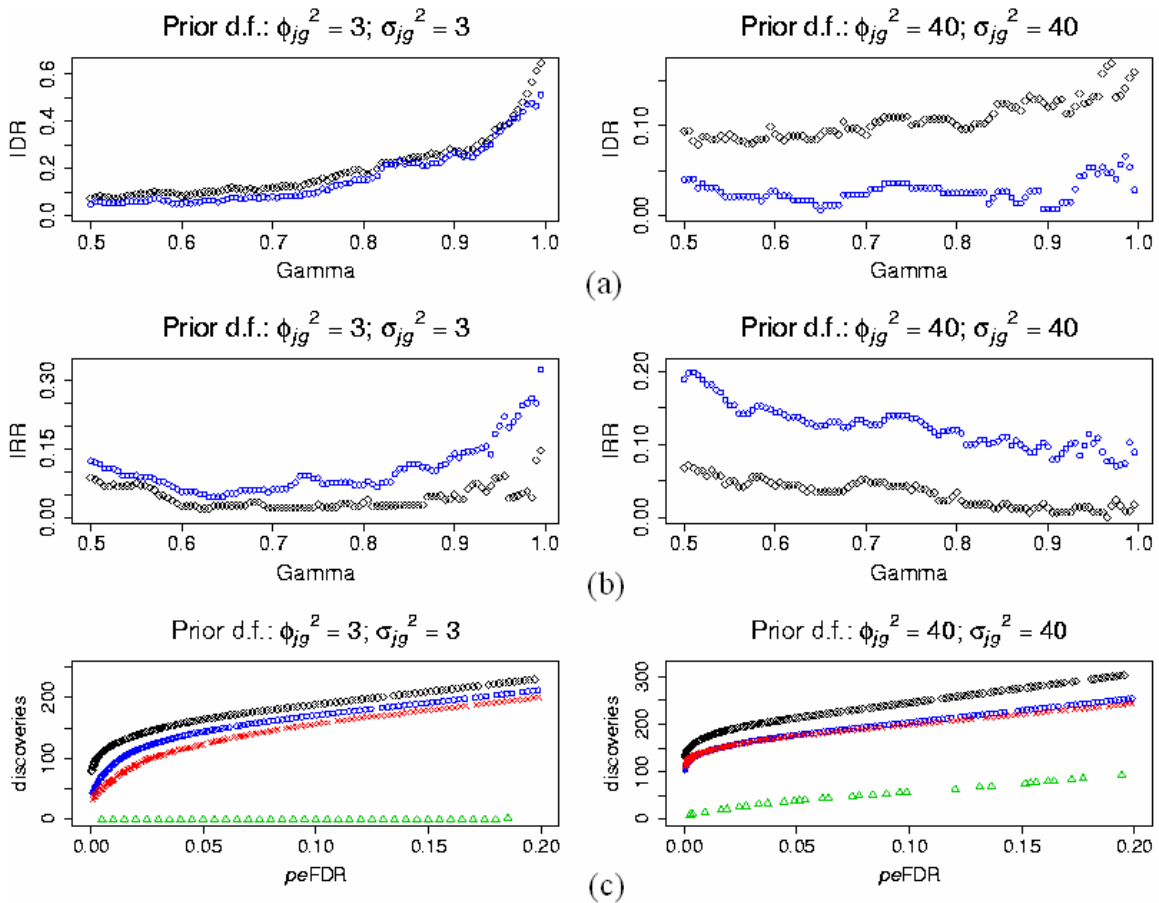

Supplement: 12859_2006_1452_MOESM1_ESM.pdf [file 12859_2006_1452_MOESM1_ESM.pdf]
