# Supplementary material for: Bayesian meta-analysis models for microarray data: a comparative study
Source: Springer Nature journal article supplement (doi:10.1186/1471-2105-8-80), 2007-03-07
Supplement: 12859_2006_1452_MOESM7_ESM.pdf [file 12859_2006_1452_MOESM7_ESM.pdf]

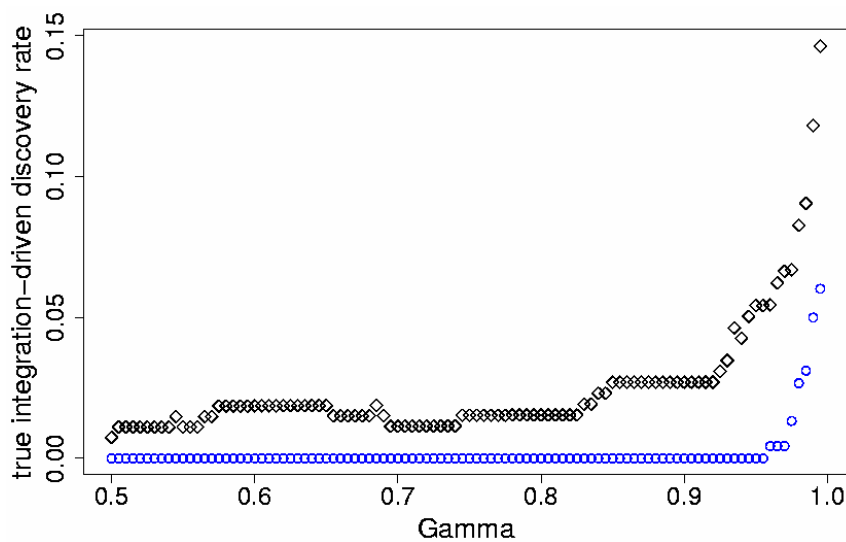

(a)

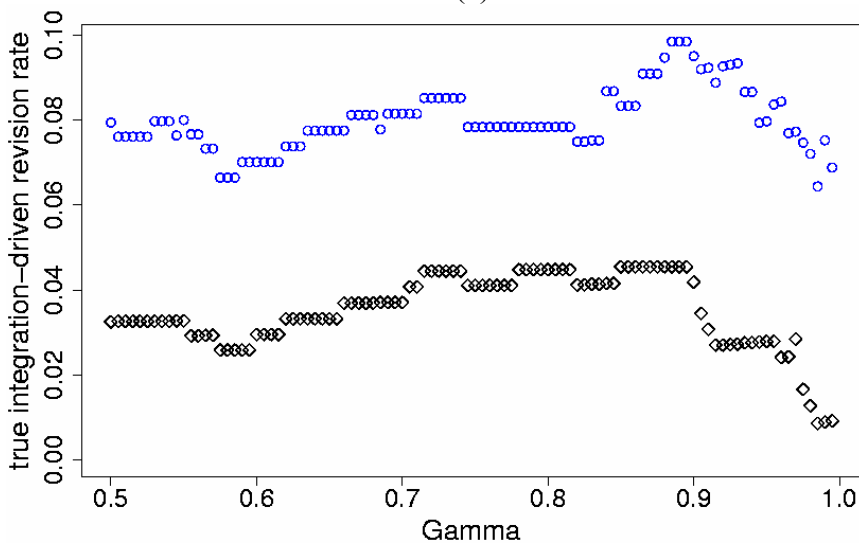

(b)

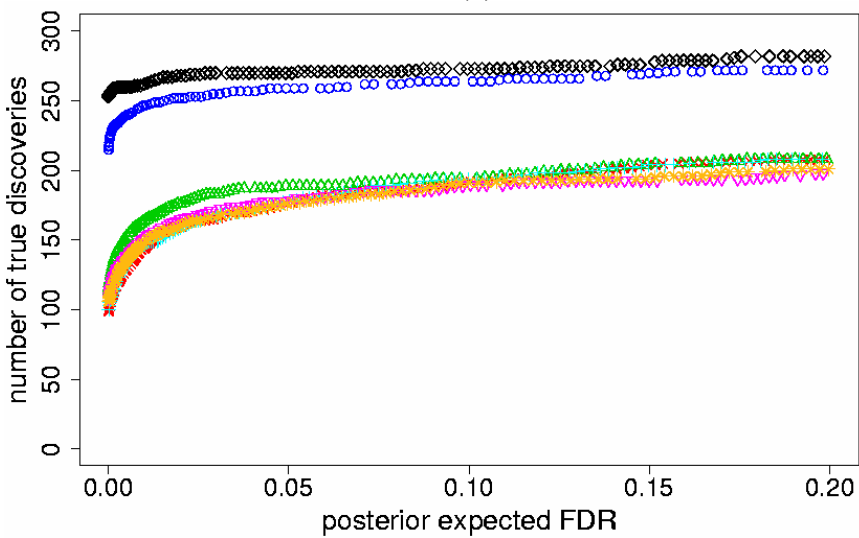

(c)
